# Supplementary material for: PPT1 regulation of HSP90α depalmitoylation participates in the pathogenesis of hyperandrogenism
Source: PubMed Central journal article supplement — iScience. 2023 Feb 3;26(3):106131. doi: 10.1016/j.isci.2023.106131 (PMC9984558; doi:10.1016/j.isci.2023.106131), 2023-02-03
Supplement: mmc1.pdf [file mmc1.pdf]

iScience, Volume 26

## **Supplemental information**

**PPT1 regulation of HSP90 $\alpha$**

**depalmitoylation participates**

**in the pathogenesis of hyperandrogenism**

**Tongmin Xue, Shanmeizi Zhao, Hong Zhang, Ting Tang, Lu Zheng, Jun Jing, Xie Ge, Rujun Ma, Jinzhao Ma, Xiaoyan Ren, Kadiliya Jueraitetibaiké, Zhigang Guo, Li Chen, and Bing Yao**

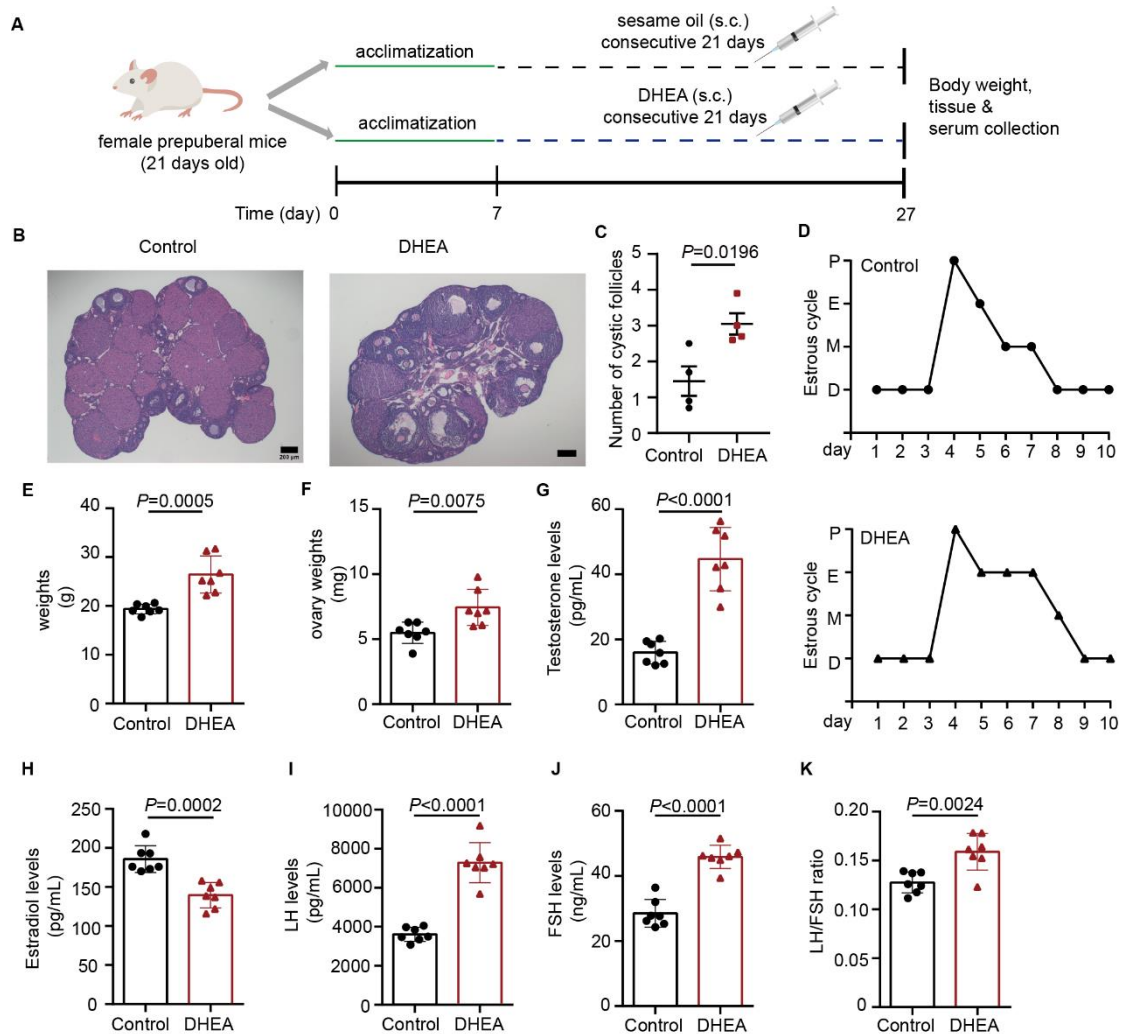

**Figure S1 The DHEA-induced mouse model displayed hyperandrogenism phenotypes, related to Figure 1.** (A) Timeline of DHEA treatment of mice. (B) Representative hematoxylin-eosin (H&E)-stained sections from the ovaries of the control and DHEA groups. Scale bar: 200  $\mu\text{m}$ . The asterisk (\*) represents the corpus luteum, and the pound sign (#) represents the ovary vacuoles. (C) Number of cystic follicles in the control and DHEA groups. (D) Representative estrous cycles. (E) Weight (n=7 mice per group). (F) Ovary weight (n=7 mice per group). (G) Testosterone levels (n=7 mice per group). (H) Estradiol levels (n=7 mice per group). (I) LH levels (n=7 mice per group). (J) FSH levels (n=7 mice per group). (K) LH/FSH (n=7 mice per group). For (C, E-K),  $P$  values were determined by two-tailed Student's  $t$  test, and data are presented as the mean values  $\pm$  SD.

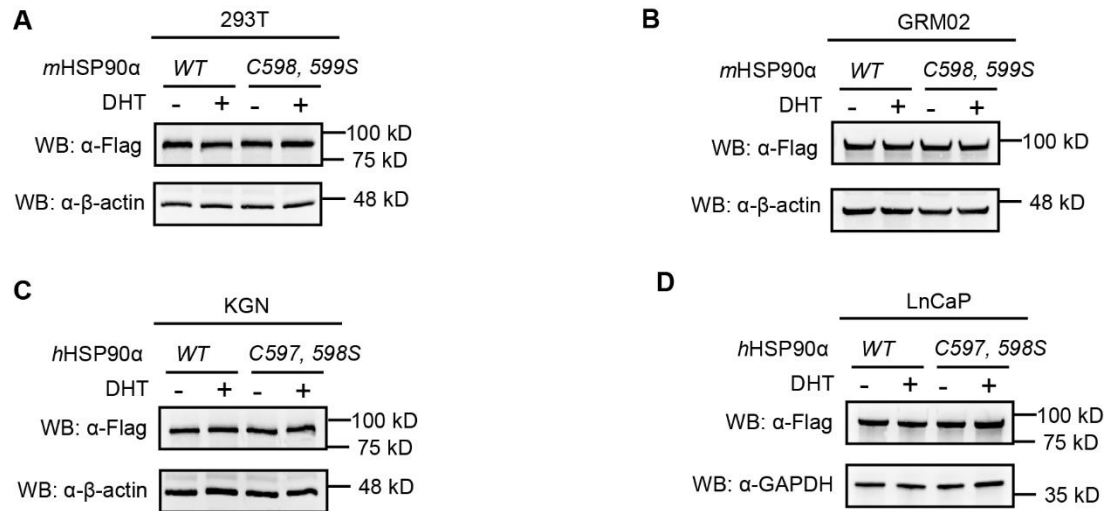

**Figure S2 HSP90α equal protein expression between WT and mutants after plasmids transfection and DHT treatment, related to Figure 4.** (A) Immunoblot analysis showing *mHSP90α* protein level in HEK293T cells transfected with Flag-tagged *mHSP90α*-WT or *mHSP90α*-C598, 599S treated with methanol or DHT (100 nM) for 24 hours. (B) Immunoblot analysis showing *mHSP90α* protein level in GRM02 cells transfected with Flag-tagged *mHSP90α*-WT or *mHSP90α*-C598, 599S treated with methanol or DHT (100 nM) for 24 hours. (C) Immunoblot analysis showing *mHSP90α* protein level in KGN cells transfected with Flag-tagged *hHSP90α*-WT or *hHSP90α*-C597, 598S treated with methanol or DHT (10 nM) for 24 hours. (D) Immunoblot analysis showing *hHSP90α* protein level in LnCaP cells transfected with Flag-tagged *hHSP90α*-WT or *hHSP90α*-C597, 598S treated with methanol or DHT (10 nM) for 24 hours.

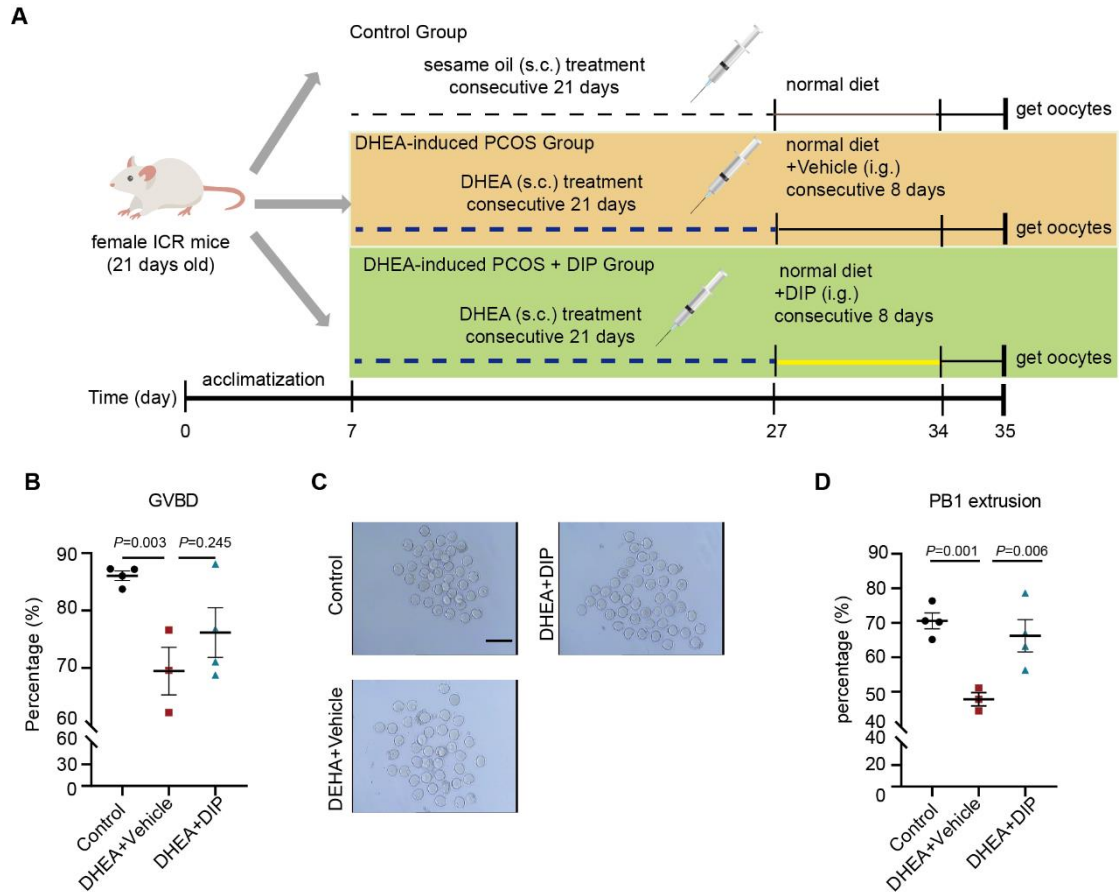

**Figure S3 Dipyridamole treatment protects against a DHEA-induced poor-quality oocyte phenotype, related to Figure 7.** (A) Timeline of dipyridamole treatment in hyperandrogenism phenotype or control mice. (B) Germinal vesicle breakdown (GVBD) percentage ( $n=4$  mice per group). (C and D) The first polar body extrusion (PBE) rate ( $n=4$  mice per group). For (B and D),  $P$  values were determined by Student's  $t$  test, and the data are presented as the mean values  $\pm$  SEMs.

**Table S1 Increased level of S-palmitoylation proteins, related to Figure 3.**

| Gene  | Full name                                                              |
|-------|------------------------------------------------------------------------|
| DYH5  | Dynein heavy chain 5                                                   |
| CAC1E | Voltage-dependent R-type calcium channel subunit alpha-1E              |
| SEPT7 | Septin-7                                                               |
| H12   | Histone H1.2                                                           |
| KPYM  | Pyruvate kinase PKM                                                    |
| STOM  | Erythrocyte band 7 integral membrane protein                           |
| DAD1  | Dolichyl-diphosphooligosaccharide--protein glycosyltransferase subunit |
| RANT  | GTP-binding nuclear protein Ran,                                       |
| 1433Z | 14-3-3 protein zeta/delta                                              |
| CO6A2 | Collagen alpha-2(VI) chain                                             |
| TNR6A | Trinucleotide repeat-containing gene 6A protein                        |
| LTBP1 | Latent-transforming growth factor beta-binding protein 1               |
| FIBB  | Fibrinogen beta chain                                                  |
| ZDHC1 | Palmitoyltransferase ZDHHC1                                            |
| NB5R3 | NADH-cytochrome b5 reductase 3                                         |

**Table S2 Decreased level of S-palmitoylation proteins, related to Figure 3.**

| Gene   | Full name                                                            |
|--------|----------------------------------------------------------------------|
| TITIN  | Titin                                                                |
| DPYL3  | Dihydropyrimidinase-related protein 3                                |
| PRDX6  | Peroxiredoxin-6                                                      |
| CD151  | CD151 antigen                                                        |
| PDIA4  | Protein disulfide-isomerase A4                                       |
| CO3A1  | Collagen alpha-1(III) chain                                          |
| MDHM   | Malate dehydrogenase                                                 |
| GNAI2  | Guanine nucleotide-binding protein G(i) subunit alpha-2              |
| GPX1   | Glutathione peroxidase 1                                             |
| AT1B2  | Sodium/potassium-transporting ATPase subunit beta-2                  |
| HSP72  | Heat shock-related 70 kDa protein 2                                  |
| ENOG   | Gamma-enolase                                                        |
| 3BHS1  | 3 beta-hydroxysteroid dehydrogenase/Delta 5--4-isomerase type 1      |
| GRP75  | Stress-70 protein                                                    |
| CHD1   | Chromodomain-helicase-DNA-binding protein 1                          |
| H15    | Histone H1.5                                                         |
| HSP90A | Heat shock protein 90, alpha (Cytosolic), class A member 1           |
| CDN1B  | Cyclin-dependent kinase inhibitor 1B                                 |
| ASPX   | Acrosomal protein SP-10                                              |
| RHG39  | Rho GTPase-activating protein 39                                     |
| RS8    | 40S ribosomal protein S8                                             |
| RAP1B  | Ras-related protein Rap-1b                                           |
| UB2L3  | Ubiquitin-conjugating enzyme E2 L3                                   |
| 1433T  | 14-3-3 protein theta                                                 |
| TERA   | Transitional endoplasmic reticulum ATPase                            |
| PGBM   | Basement membrane-specific heparan sulfate proteoglycan core protein |
| SPB6   | Serpin B6                                                            |
| ADRO   | NADPH:adrenodoxin oxidoreductase                                     |
| ZYX    | Zyxin                                                                |
| HUMMR  | Protein MGARP                                                        |
| THIKA  | 3-ketoacyl-CoA thiolase A                                            |
| MCCA   | Methylcrotonoyl-CoA carboxylase subunit alpha                        |
| RRBP1  | Ribosome-binding protein 1                                           |
| ACBG1  | Long-chain-fatty-acid--CoA ligase ACSBG1                             |
| UQCC2  | Ubiquinol-cytochrome-c reductase complex assembly factor 2           |
| CRIP2  | Cysteine-rich protein 2                                              |
| AL9A1  | 4-trimethylaminobutyraldehyde dehydrogenase                          |
| K1C17  | Keratin, type I cytoskeletal 17                                      |
| PEPL   | Periplakin                                                           |
| INSRR  | Insulin receptor-related protein                                     |
| ASAH1  | Acid ceramidase                                                      |
| SAE2   | SUMO-activating enzyme subunit 2                                     |

**Table S3. Clinical characteristics in women with or without ovarian hyperandrogenism in PCOS, related to Figure 5.**

|                                 | Control (n=5) | ovarian hyperandrogenism in PCOS (n=5) | <i>P</i> value |
|---------------------------------|---------------|----------------------------------------|----------------|
| Age (year)                      | 26.5±2.26     | 24.0±1.79                              | 0.059          |
| Body Mass Index                 | 21.3±1.71     | 24.0±4.33                              | 0.189          |
| FSH (IU/L)                      | 8.05±1.94     | 4.79±1.22                              | 0.006          |
| LH (IU/L)                       | 9.3±3.20      | 16.8±6.25                              | 0.033          |
| LH/FSH                          | 1.2±0.33      | 3.4±0.48                               | <0.0001        |
| Estradiol (nmol/L)              | 0.22±0.088    | 0.185±0.056                            | 0.449          |
| Testosterone (nmol/L)           | 4.35±0.78     | 4.94±1.39                              | 0.387          |
| Dehydroepiandrosterone (nmol/L) | 4.12±0.82     | 7.83±1.78                              | 0.001          |

FSH, follicle-stimulating hormone; LH, luteinizing hormone; *P* value were analyzed by two-tailed Student's *t*-test (for two groups).
